research in anesthesia. It does not provide answers to any of the four specific items.

What this publication does do very well is present the difficulties inherent in answering the above four questions. The questions on the surface seem very appropriate and direct. The answers to these questions are of extreme importance to the future of the specialty, and for probably health care delivery overall. Unfortunately, answers are at least partially obscured by a multiplicity of problems, which are well described in this book.

The participants are from many disciplines, and a resulting thorough and broad look at the problem is presented. I find the book easily readable even though I am not versed in statistics or epidemiology. I believe that as a result of reading this book I have a far greater appreciation of the questions posed, and perhaps even a deeper insight into the overall practice of anesthesia. For those anticipating or even thinking about studies of the health care delivery of this specialty, or the future direction of the specialty, the report of this symposium is a valuable background document.

Determination of the effect of anesthesia care on patient well-being is an appropriate—in fact, laudable—goal. When one realizes the difficulties in defining and measuring “anesthesia care” and “patient well-being” the difficulties are not surprising. The desire was expressed in the introduction of the book that the conference “. . . could continue in recess rather than evaporate the determination of this meeting.” Unfortunately, this has not happened.

WILLIAM K. HAMILTON, M.D.  
*Professor and Chairman  
Anesthesiology  
University of California, San Francisco  
San Francisco, California 94143*

**Laryngo-Tracheal Problems in the Pediatric Patient.** EDITED BY GERALD B. HEALY AND TREVOR J. I. MCGILL. Springfield, Ill. Charles C Thomas, 1979. Pages: 129. Price: \$13.75.

This clinically oriented book is a collection of contributions from 19 noted experts in pediatric laryngotracheal disease and treatment. The book is dedicated to the late Paul H. Holinger, M.D., and contains a contribution from his work.

The work is organized in an easy-to-use format, progressing from basic embryology with a clinical perspective through the differential diagnosis of upper airway obstruction to the various disease entities that involve the upper and lower airways. The chapters are written with a clinical direction, and are straightforward in approach. The last two chapters present panel discussions on the management of acute inflammatory airway obstruction and the management of the artificial airway in the pediatric patient. The discussions provide an excellent overview of many considerations in the area of the pediatric airway and its disease management.

The entities of epiglottitis and acute laryngotracheobronchitis are discussed in depth, in both the individual chapters and the panel discussion.

This book will provide clinicians in anesthesiology, otolaryngology, pediatrics, and allied specialties with a good overview of this most difficult and interesting area.

STANLEY W. COULTHARD, M.D.  
*Associate Professor, Surgery  
Section of Otorhinolaryngology  
University of Arizona Health Sciences Center  
Tucson, Arizona 85724*

### Books Received

| Title & Edition                                                            | Author/Editor                      | Publisher                                                   |       |         |
|----------------------------------------------------------------------------|------------------------------------|-------------------------------------------------------------|-------|---------|
|                                                                            |                                    | Address, Name, Year                                         | Pages | Price   |
| <b>Anesthetic Exposure in the Workplace</b>                                | Ellis Cohen                        | Littleton, Mass.<br>PSG Publishing Co., Inc.<br>1980        | 210   | \$22.50 |
| <b>Assessment of Pulmonary Function</b>                                    | Alfred P. Fishman                  | New York<br>McGraw-Hill<br>1980                             | 307   | \$17.95 |
| <b>The Circulation in Anaesthesia, Applied Physiology and Pharmacology</b> | C. Prys-Roberts                    | Great Britain<br>Blackwell Scientific Publications<br>1980  | 642   | \$87.75 |
| <b>Emotional and Psychological Responses to Anesthesia and Surgery</b>     | Frank Guerra<br>J. Antonio Aldrete | New York<br>Grune and Stratton, Inc.<br>1980                | 264   | \$23.50 |
| <b>Handbook of Obstetrics and Gynecology</b><br>7th edition                | Ralph C. Benson                    | Los Altos, California<br>Lange Medical Publications<br>1980 | 808   | \$10.00 |
| <b>La Sismothérapie Moderne sous Narcose et Curarisation</b>               | Jacques Boureau                    | Paris<br>Doin Editeurs<br>1980                              | 114   | PNS     |
